# Supplementary material
Source: PubMed Central journal article supplement (PMC3663958)
Supplement: 11606_2013_2332_MOESM1_ESM.pdf [file 11606_2013_2332_MOESM1_ESM.pdf]

# Appendix 1: HIV Warmline Survey Instrument

## Professional Information

### 1. What is your profession?

- MD/DO
- NP
- PA
- Other (please specify)

### 2. What year did you graduate from medical/professional school? (do not include post-graduate training)

### 3. What is your primary specialty?

- General Practice
- Family Medicine
- Internal Medicine
- Other (please specify)

# Appendix 1: HIV Warmline Survey Instrument

## Practice Setting

### 1. How would you describe your main clinical setting (choose the most applicable)?

- Private practice - solo
- Private practice - group
- Public health/community clinic
- HMO
- Other (please specify)
- Correctional facility
- University/hospital associated clinic
- Urgent care/emergency department
- Hospital (inpatient)

### 2. What type of area is your main practice in?

- Urban
- Suburban
- Rural

### 3. Does your primary work setting accept Medicaid? (or MediCal in California)

- Yes
- No
- Don't know

# Appendix 1: HIV Warmline Survey Instrument

## HIV Experience

### 1. How many HIV-positive patients do you currently have in your patient panel?

- 0
- 1-5
- 6-25
- >25
- I do not currently care for patients

### 2. Which best describes the service you provide to HIV-infected persons?

- Provide comprehensive services, including HIV medication therapy, at all stages of disease (with or without consultation)
- Provide comprehensive services, including HIV medication therapy, but refer if patients develop complications
- Provide services until the need for HIV medication therapy, then refer
- Provide services only for conditions not related to HIV
- I do not provide care for HIV-infected patients

### 3. Do you consider yourself to be an HIV expert?

- Yes
- No
- Don't know

# Appendix 1: HIV Warmline Survey Instrument

## HIV Information Seeking

### 1. How likely are you to use the following resources when you have an HIV-related question?

|                                                     | Not at all likely     | Somewhat likely       | Moderately likely     | Very likely           | Extremely likely      |
|-----------------------------------------------------|-----------------------|-----------------------|-----------------------|-----------------------|-----------------------|
| Textbook                                            | <input type="radio"/> |
| Informal curbside consult                           | <input type="radio"/> |
| Patient referral to an HIV-expert                   | <input type="radio"/> |
| HIV Warmline                                        | <input type="radio"/> |
| Internet search (Google, Yahoo etc.)                | <input type="radio"/> |
| Pubmed or other medical literature search           | <input type="radio"/> |
| Online medical resource (HIVinsite, Medscape, etc.) | <input type="radio"/> |
| Other                                               | <input type="radio"/> |

If other, please specify:

# Appendix 1: HIV Warmline Survey Instrument

## Experience with the HIV Warmline

**1. Aside from the HIV Warmline, which ONE of these resources do you MOST commonly use?**

**(Choose only one)**

- Textbook
- Informal curbside consult
- Patient referral to an HIV-expert
- Internet search (Google, Yahoo etc.)
- Pubmed or other medical literature search
- Online medical resource (HIVinsite, Medscape, etc.)
- Other

If other (please specify)

**2. Compared to this resource, how QUICKLY does the HIV Warmline provide you with an answer to your question?**

Much less quickly      Less quickly      About the same      More quickly      Much more quickly

                      

**3. Compared to this resource, how APPLICABLE to your particular clinical situation is the information from the HIV Warmline?**

Much less applicable      Less applicable      About the same      More applicable      Much more applicable

                      

**4. Compared to this resource, how TRUSTWORTHY is the information from the HIV Warmline?**

Much less trustworthy      Less trustworthy      About the same      More trustworthy      Much more trustworthy

# Appendix 1: HIV Warmline Survey Instrument

## Experience with the HIV Warmline (cont.)

### 1. How important are the following features of the HIV Warmline?

|                                                          | Not at all important  | Somewhat important    | Moderately important  | Very important        | Extremely important   |
|----------------------------------------------------------|-----------------------|-----------------------|-----------------------|-----------------------|-----------------------|
| Live consultants                                         | <input type="radio"/> |
| Free service                                             | <input type="radio"/> |
| Confidential                                             | <input type="radio"/> |
| Provides advice based on federal HIV practice guidelines | <input type="radio"/> |

### 2. To what extent do you agree with the following statements?

|                                                                                          | Strongly disagree     | Disagree              | Neither agree nor disagree | Agree                 | Strongly agree        |
|------------------------------------------------------------------------------------------|-----------------------|-----------------------|----------------------------|-----------------------|-----------------------|
| Using the HIV Warmline has improved my confidence about caring for HIV-infected patients | <input type="radio"/> | <input type="radio"/> | <input type="radio"/>      | <input type="radio"/> | <input type="radio"/> |
| The HIV Warmline has helped me stay up-to-date with HIV care                             | <input type="radio"/> | <input type="radio"/> | <input type="radio"/>      | <input type="radio"/> | <input type="radio"/> |
| Using the HIV Warmline has changed the way I manage my HIV patients                      | <input type="radio"/> | <input type="radio"/> | <input type="radio"/>      | <input type="radio"/> | <input type="radio"/> |
| The HIV Warmline has helped me manage HIV without having to refer the patient elsewhere  | <input type="radio"/> | <input type="radio"/> | <input type="radio"/>      | <input type="radio"/> | <input type="radio"/> |

### 3. Do you believe that your patients' health has improved because of your use of the HIV Warmline?

|   | Not at all            | Somewhat              | Moderately            | A lot                 | Very much so          |
|---|-----------------------|-----------------------|-----------------------|-----------------------|-----------------------|
| . | <input type="radio"/> |

### 4. Do you plan to continue using the HIV Warmline?

Yes                       No                       Don't know

### 5. Is there anything we can improve on?
